# Supplementary material for: CD11c+ T-bet+ CD21hi B Cells Are Negatively Associated With Renal Impairment in Systemic Lupus Erythematosus and Act as a Marker for Nephritis Remission
Source: PubMed Central journal article supplement (PMC9160198; doi:10.3389/fimmu.2022.892241), 2022-05-19
Supplement: DataSheet_1.pdf [file DataSheet_1.pdf]

**Supplementary Table 1. Baseline characteristics of LN patients at recruitment time.**

| Features                                | Followed up LN patients (n = 9) | Non-followed up LN patients (n = 8) | p value |
|-----------------------------------------|---------------------------------|-------------------------------------|---------|
| SLEDAI score                            | 22 (16-32)                      | 22 (18-35)                          | 0.2644  |
| White blood cell count/mL [ $10^6$ ]    | 6.4 (5.8-8.9)                   | 6.8 (3.9-10.1)                      | 0.9303  |
| Absolute lymphocyte count/mL [ $10^6$ ] | 0.69 (0.44-1.22)                | 0.77 (0.42-0.97)                    | 0.6419  |
| Monocytes, %                            | 6.8 (3.9-8.7)                   | 5.5 (4.4-8.9)                       | 0.9517  |
| Neutrophils, %                          | 81.1 (72.7-87.7)                | 79.1 (75.8-89.7)                    | 0.8723  |
| Platelet count, K/ $\mu$ L              | 167 (125-260)                   | 172 (71-231)                        | 0.3154  |
| B cells, %                              | 19.1 (17.8-20.8)                | 20.6 (18.3-23.1)                    | 0.1940  |
| Creatinine, mg/dL                       | 1.6 (1.15-3.95)                 | 2.3 (2.14-3.65)                     | 0.3238  |
| eGFR, mL/min                            | 32 (28-65)                      | 37 (22-55)                          | 0.4668  |
| C3, mg/dL                               | 48 (37-59)                      | 54 (43-64)                          | 0.5487  |
| C4, mg/dL                               | 8 (8-19)                        | 8 (8-8.75)                          | 0.8114  |
| Anti-dsDNA (UI/mL)                      | 657.3 (355.6-835.9)             | 183.4 (52.68-434.8)                 | 0.1784  |

Data presented are the median (IQR). P values were obtained by U-Mann-Whitney test.

**Supplementary Table 2. Induction therapy dosage of all LN patients.**

| <b>Therapy (dose)</b>              | <b>LN patients (#)</b> |
|------------------------------------|------------------------|
| <b>Mycophenolate Mofetil (MMF)</b> |                        |
| 3000 (mg/day)                      | 3                      |
| 1500 (mg/day)                      | 1                      |
| 1000 (mg/day)                      | 4                      |
| <b>Cyclophosphamide (CYC)</b>      |                        |
| 1000 (mg/day)                      | 7                      |
| 800 (mg/day)                       | 1                      |
| 600 (mg/day)                       | 1                      |
| <b>Prednisone</b>                  |                        |
| 60 (mg/day)                        | 17                     |

**Supplementary Table 3. Comparative analyses of ABCs and CD21<sup>hi</sup> cell counts regarding employed therapies in followed-up LN (6 months) patients.**

| <b>Feature</b> | <b>ABCs subset</b>  |                      |                | <b>CD21<sup>hi</sup> subset</b> |                     |                |
|----------------|---------------------|----------------------|----------------|---------------------------------|---------------------|----------------|
| <b>Therapy</b> | <b>MMF</b><br>n = 5 | <b>CYC</b><br>n = 4  | <b>p value</b> | <b>MMF</b><br>n = 5             | <b>CYC</b><br>n = 4 | <b>p value</b> |
|                | 2082<br>(1581-6086) | 1239<br>(896.8-3615) | 0.2857         | 700<br>(409-1139)               | 514<br>(65-2082)    | 0.9000         |

Data presented are the median of absolute cell counts (cells/mL) of each subset (IQR). MMF: Mycophenolate Mofetil, CYC: Cyclophosphamide. P values were obtained by U-Mann-Whitney test.

**Supplementary Table 4. Correlations between ABCs or CD21<sup>hi</sup> cell counts with dosage of induction therapy in followed-up LN (6 months) patients.**

| Therapy               | ABCs subset |        | CD21 <sup>hi</sup> subset |        |
|-----------------------|-------------|--------|---------------------------|--------|
|                       | r           | p      | r                         | p      |
| Mycophenolate Mofetil | -0.2887     | 0.6376 | 0.5774                    | 0.3081 |
| Cyclophosphamide      | 0.6325      | 0.3675 | 0.6325                    | 0.3675 |

**Supplementary Figure 1**
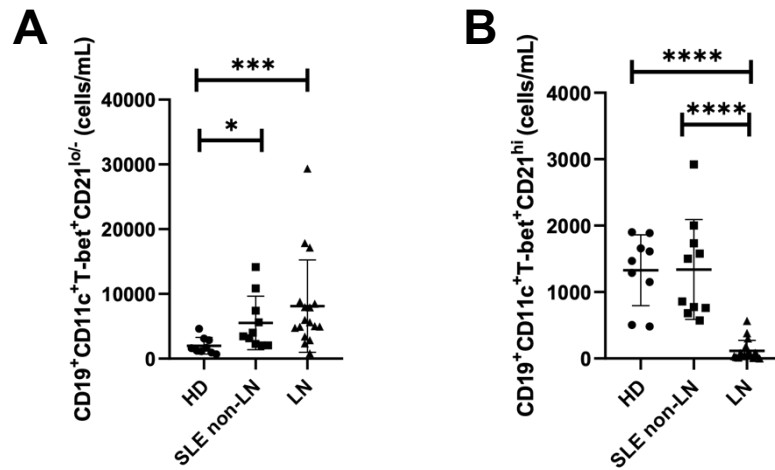

**Supplementary Figure 1. Alterations of ABCs and CD21<sup>hi</sup> B cell subsets absolute counts in lupus nephritis.** A) Comparative analysis of ABCs absolute counts between cohorts of healthy donors (HD), non-LN lupus patients and LN. B) Comparative analysis of CD21<sup>hi</sup> absolute counts between the same cohorts. All comparative analysis were assessed by a Kruskal-Wallis test followed by a Dunn's post-hoc test. \* $p \leq 0.05$ , \*\*\* $p \leq 0.001$ , \*\*\*\* $p \leq 0.0001$ .

**Supplementary Figure 2**
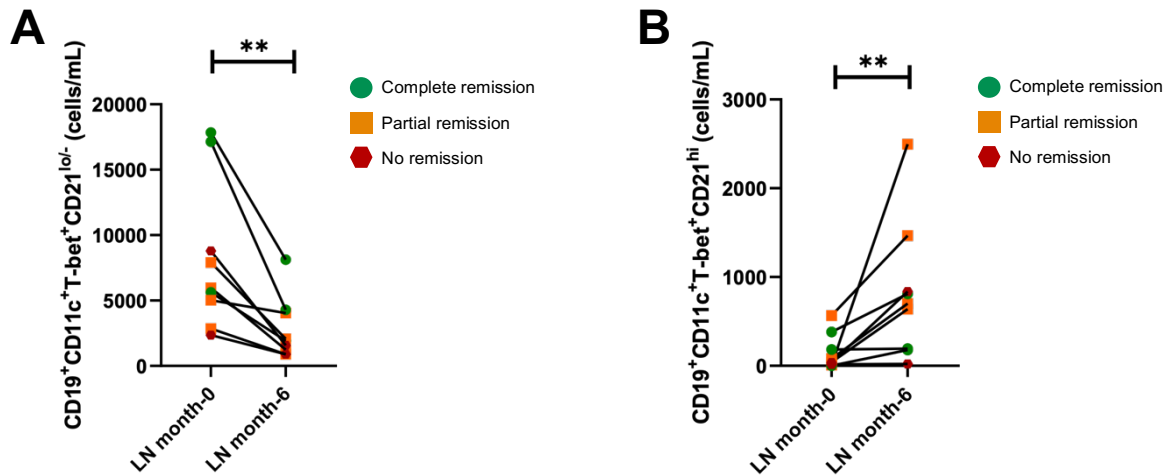

**Supplementary Figure 2. Effect of induction therapy over absolute counts of ABCs and CD21<sup>hi</sup> subsets.** A) Comparative analysis of ABCs absolute counts between patients at the beginning of induction therapy (month 0), and the same patients after 6 months of treatment. B) Comparative analysis of CD21<sup>hi</sup> absolute counts between the same cohorts. Both comparative analyses were assessed by a Wilcoxon test. n = 9, \*\*p≤0.01.
